# Supplementary material for: OncomiR miR-182-5p Enhances Radiosensitivity by Inhibiting the Radiation-Induced Antioxidant Effect through SESN2 in Head and Neck Cancer
Source: MDPI journal article supplement (doi:10.3390/antiox10111808), 2021-11-14
Supplement: s1 [file s1]

**Supplementary Table S1.** The information about 19 cases of HNSCC patients was showed.

| <b>ID</b> | <b>Gender</b> | <b>Tumor location</b> | <b>TNM</b> |
|-----------|---------------|-----------------------|------------|
| 519T      | M             | Left glottic          | pT2N0M0    |
| 567T      | M             | Left tongue           | cT4aN2cM0  |
| 571T      | M             | Hypopharyngeal        | pT4aN2cM0  |
| 573T      | M             | Left hypopharyngeal   | cT2N0M0    |
| 574T      | M             | Right hypopharyngeal  | pT3N2bM0   |
| 575T      | M             | Hypopharyngeal        | CT2N0M0    |
| 576T      | M             | Lt vallecular         | cT3N2cM0   |
| 577T      | M             | Glottis               | pT2N0M0    |
| 580T      | M             | Soft palate           | T1N2cM0    |
| 588T      | M             | left, Tongue          | pT2N1M0    |
| 759T      | F             | Hypopharyngeal        | CT2N2BMO   |
| 761T      | M             | Oropharyngeal tonsil  | pT2N2bM0   |
| 763T      | M             | RT Retromolar         | PT2N0M0    |
| 764T      | M             | Lt tonsil             | cT2N0M0    |
| 765T      | M             | Left lower gingiva    | pT4aN1M0   |
| 767T      | M             | Right tongue          | cT4aN2cM0  |
| 768T      | M             | Right hypopharyngeal  | pT4aN2bM0  |
| 770T      | M             | Right supraglottic    | pT2N1M     |
| 771T      | M             | Hypopharyngeal        | cT4aN3M1   |

**Supplementary Table S2.** The co-prediction microRNA targets of miR-182-5p involved in miRanda, TargetScan and PITA.

| ID       | Gene Name                                   | GOTERM_BP_DIRECT                                                                                                                                                                                                                                                                                                                                                                                                                                                                                                                                                                                                                                                                                                                                                                                                                                                                                                                       |
|----------|---------------------------------------------|----------------------------------------------------------------------------------------------------------------------------------------------------------------------------------------------------------------------------------------------------------------------------------------------------------------------------------------------------------------------------------------------------------------------------------------------------------------------------------------------------------------------------------------------------------------------------------------------------------------------------------------------------------------------------------------------------------------------------------------------------------------------------------------------------------------------------------------------------------------------------------------------------------------------------------------|
| ARF4     | ADP ribosylation factor 4(ARF4)             | GO:0006471~protein ADP-ribosylation,GO:0006888~ER to Golgi vesicle-mediated transport,GO:0006890~retrograde vesicle-mediated transport, Golgi to ER,GO:0007173~epidermal growth factor receptor signaling pathway,GO:0007264~small GTPase mediated signal transduction,GO:0007420~brain development,GO:0007612~learning,GO:0015031~protein transport,GO:0016477~cell migration,GO:0031584~activation of phospholipase D activity,GO:0043066~negative regulation of apoptotic process,GO:0043547~positive regulation of GTPase activity,GO:0045176~apical protein localization,GO:0045197~establishment or maintenance of epithelial cell apical/basal polarity,GO:0045944~positive regulation of transcription from RNA polymerase II promoter,GO:0048678~response to axon injury,GO:0060996~dendritic spine development,GO:0061512~protein localization to cilium,GO:2000377~regulation of reactive oxygen species metabolic process, |
| AMMECR1L | AMMECR1 like(AMMECR1L)                      |                                                                                                                                                                                                                                                                                                                                                                                                                                                                                                                                                                                                                                                                                                                                                                                                                                                                                                                                        |
| ACTR2    | ARP2 actin related protein 2 homolog(ACTR2) | GO:0006928~movement of cell or subcellular component,GO:0007163~establishment or maintenance of cell polarity,GO:0008356~asymmetric cell division,GO:0016344~meiotic chromosome movement towards spindle pole,GO:0016482~cytosolic transport,GO:0033206~meiotic cytokinesis,GO:0034314~Arp2/3 complex-mediated actin nucleation,GO:0038096~Fc-gamma receptor signaling pathway involved in phagocytosis,GO:0042384~cilium assembly,GO:0048013~ephrin receptor signaling pathway,GO:0051653~spindle localization,                                                                                                                                                                                                                                                                                                                                                                                                                       |
| BCL11A   | B-cell CLL/lymphoma 11A(BCL11A)             | GO:0000122~negative regulation of transcription from RNA polymerase II promoter,GO:0006351~transcription, DNA-templated,GO:0007165~signal transduction,GO:0010976~positive regulation of neuron projection development,GO:0010977~negative regulation of neuron projection development,GO:0016925~protein sumoylation,GO:0030517~negative regulation of axon extension,GO:0032463~negative regulation of protein homooligomerization,GO:0045944~positive regulation of transcription from RNA polymerase II promoter,GO:0048671~negative regulation of collateral sprouting,GO:0048672~positive regulation of collateral sprouting,GO:0050773~regulation of dendrite                                                                                                                                                                                                                                                                   |

|         |                                                   |                                                                                                                                                                                                                                                                                                                                                                                                                                                                                                                                                                                                                                                                                                                                                                                                                                                                                                                                                                                                                                       |
|---------|---------------------------------------------------|---------------------------------------------------------------------------------------------------------------------------------------------------------------------------------------------------------------------------------------------------------------------------------------------------------------------------------------------------------------------------------------------------------------------------------------------------------------------------------------------------------------------------------------------------------------------------------------------------------------------------------------------------------------------------------------------------------------------------------------------------------------------------------------------------------------------------------------------------------------------------------------------------------------------------------------------------------------------------------------------------------------------------------------|
|         |                                                   | development,GO:2000171~negative regulation of dendrite development,                                                                                                                                                                                                                                                                                                                                                                                                                                                                                                                                                                                                                                                                                                                                                                                                                                                                                                                                                                   |
| BAG4    | BCL2 associated<br>athanogene 4(BAG4)             | GO:0006457~protein folding,GO:0010763~positive regulation of fibroblast migration,GO:0030838~positive regulation of actin filament polymerization,GO:0033138~positive regulation of peptidyl-serine phosphorylation,GO:0033209~tumor necrosis factor-mediated signaling pathway,GO:0043066~negative regulation of apoptotic process,GO:0045785~positive regulation of cell adhesion,GO:0051291~protein heterooligomerization,GO:0051496~positive regulation of stress fiber assembly,GO:0051897~positive regulation of protein kinase B signaling,GO:0071356~cellular response to tumor necrosis factor,GO:0071364~cellular response to epidermal growth factor stimulus,GO:0072659~protein localization to plasma membrane,GO:0090367~negative regulation of mRNA modification,GO:0097178~ruffle assembly,GO:1900034~regulation of cellular response to heat,GO:1903215~negative regulation of protein targeting to mitochondrion,GO:2001145~negative regulation of phosphatidylinositol-3,4,5-trisphosphate 5-phosphatase activity, |
| BCL2L12 | BCL2 like<br>12(BCL2L12)                          | GO:0006915~apoptotic process,GO:0045944~positive regulation of transcription from RNA polymerase II promoter,GO:1902166~negative regulation of intrinsic apoptotic signaling pathway in response to DNA damage by p53 class mediator,GO:1990001~inhibition of cysteine-type endopeptidase activity involved in apoptotic process,GO:2000773~negative regulation of cellular senescence,                                                                                                                                                                                                                                                                                                                                                                                                                                                                                                                                                                                                                                               |
| CEBPA   | CCAAT/enhancer<br>binding protein<br>alpha(CEBPA) | GO:0000050~urea cycle,GO:0000122~negative regulation of transcription from RNA polymerase II promoter,GO:0001889~liver development,GO:0001892~embryonic placenta development,GO:0006091~generation of precursor metabolites and energy,GO:0006351~transcription, DNA-templated,GO:0006360~transcription from RNA polymerase I promoter,GO:0006366~transcription from RNA polymerase II promoter,GO:0007005~mitochondrion organization,GO:0007219~Notch signaling pathway,GO:0008203~cholesterol metabolic process,GO:0008285~negative regulation of cell proliferation,GO:0016032~viral process,GO:0019221~cytokine-mediated signaling pathway,GO:0030099~myeloid cell differentiation,GO:0030225~macrophage differentiation,GO:0030324~lung development,GO:0030851~granulocyte differentiation,GO:0032436~positive regulation of proteasomal ubiquitin-dependent protein catabolic process,GO:0042593~glucose homeostasis,GO:0045444~fat cell differentiation,GO:0045600~positive regulation of fat cell                             |

|        |                                                                                                      |                                                                                                                                                                                                                                                                                                                                                                                                                                                                                                                                                                                                                                                                                                                                                                                                                                                                                           |
|--------|------------------------------------------------------------------------------------------------------|-------------------------------------------------------------------------------------------------------------------------------------------------------------------------------------------------------------------------------------------------------------------------------------------------------------------------------------------------------------------------------------------------------------------------------------------------------------------------------------------------------------------------------------------------------------------------------------------------------------------------------------------------------------------------------------------------------------------------------------------------------------------------------------------------------------------------------------------------------------------------------------------|
|        |                                                                                                      | <p>differentiation,GO:0045669~positive regulation of osteoblast</p> <p>differentiation,GO:0045736~negative regulation of cyclin-dependent protein</p> <p>serine/threonine kinase activity,GO:0045892~negative regulation of transcription,</p> <p>DNA-templated,GO:0045944~positive regulation of transcription from RNA</p> <p>polymerase II promoter,GO:0045945~positive regulation of transcription from</p> <p>RNA polymerase III promoter,GO:0048469~cell maturation,GO:0048839~inner</p> <p>ear development,GO:0050872~white fat cell differentiation,GO:0050873~brown</p> <p>fat cell differentiation,GO:0055088~lipid homeostasis,GO:0071285~cellular</p> <p>response to lithium ion,GO:0071356~cellular response to tumor necrosis</p> <p>factor,GO:0071407~cellular response to organic cyclic compound,</p>                                                                    |
| CD164  | CD164<br>molecule(CD164)                                                                             | <p>GO:0006955~immune response,GO:0007155~cell</p> <p>adhesion,GO:0007157~heterophilic cell-cell adhesion via plasma membrane cell</p> <p>adhesion molecules,GO:0007162~negative regulation of cell</p> <p>adhesion,GO:0007165~signal transduction,GO:0007275~multicellular organism</p> <p>development,GO:0007517~muscle organ development,GO:0008285~negative</p> <p>regulation of cell proliferation,GO:0030097~hemopoiesis,</p>                                                                                                                                                                                                                                                                                                                                                                                                                                                        |
| CD2AP  | CD2 associated<br>protein(CD2AP)                                                                     | <p>GO:0006461~protein complex assembly,GO:0006930~substrate-dependent cell</p> <p>migration, cell extension,GO:0007010~cytoskeleton</p> <p>organization,GO:0007067~mitotic nuclear division,GO:0007165~signal</p> <p>transduction,GO:0016050~vesicle organization,GO:0016337~single organismal</p> <p>cell-cell adhesion,GO:0032911~negative regulation of transforming growth factor</p> <p>beta1 production,GO:0043161~proteasome-mediated ubiquitin-dependent protein</p> <p>catabolic process,GO:0048259~regulation of receptor-mediated</p> <p>endocytosis,GO:0051301~cell division,GO:1900182~positive regulation of</p> <p>protein localization to nucleus,GO:2000249~regulation of actin cytoskeleton</p> <p>reorganization,</p>                                                                                                                                                  |
| CITED2 | Cbp/p300 interacting<br>transactivator with<br>Glu/Asp rich carboxy-<br>terminal domain<br>2(CITED2) | <p>GO:0000122~negative regulation of transcription from RNA polymerase II</p> <p>promoter,GO:0001570~vasculogenesis,GO:0001666~response to</p> <p>hypoxia,GO:0001829~trophectodermal cell differentiation,GO:0001843~neural</p> <p>tube closure,GO:0001889~liver development,GO:0001892~embryonic placenta</p> <p>development,GO:0001947~heart looping,GO:0002089~lens morphogenesis in</p> <p>camera-type eye,GO:0002244~hematopoietic progenitor cell</p> <p>differentiation,GO:0003151~outflow tract morphogenesis,GO:0003156~regulation</p> <p>of organ formation,GO:0003197~endocardial cushion</p> <p>development,GO:0006351~transcription, DNA-</p> <p>templated,GO:0006355~regulation of transcription, DNA-</p> <p>templated,GO:0007179~transforming growth factor beta receptor signaling</p> <p>pathway,GO:0007368~determination of left/right symmetry,GO:0007417~central</p> |

|        |                                            |                                                                                                                                                                                                                                                                                                                                                                                                                                                                                                                                                                                                                                                                                                                                                                                                                                                                                                                                                                                                                                                                                                                                                                                                                                                                                                                                                                                                                                                                                                                                                                                                                                                                                                                                                                                                                                                                                                                                                                                                                                                                                                                                               |
|--------|--------------------------------------------|-----------------------------------------------------------------------------------------------------------------------------------------------------------------------------------------------------------------------------------------------------------------------------------------------------------------------------------------------------------------------------------------------------------------------------------------------------------------------------------------------------------------------------------------------------------------------------------------------------------------------------------------------------------------------------------------------------------------------------------------------------------------------------------------------------------------------------------------------------------------------------------------------------------------------------------------------------------------------------------------------------------------------------------------------------------------------------------------------------------------------------------------------------------------------------------------------------------------------------------------------------------------------------------------------------------------------------------------------------------------------------------------------------------------------------------------------------------------------------------------------------------------------------------------------------------------------------------------------------------------------------------------------------------------------------------------------------------------------------------------------------------------------------------------------------------------------------------------------------------------------------------------------------------------------------------------------------------------------------------------------------------------------------------------------------------------------------------------------------------------------------------------------|
|        |                                            | <p>nervous system development,GO:0007422~peripheral nervous system development,GO:0007507~heart development,GO:0007530~sex determination,GO:0007569~cell aging,GO:0008283~cell proliferation,GO:0008584~male gonad development,GO:0009612~response to mechanical stimulus,GO:0010628~positive regulation of gene expression,GO:0010629~negative regulation of gene expression,GO:0021602~cranial nerve morphogenesis,GO:0022409~positive regulation of cell-cell adhesion,GO:0030154~cell differentiation,GO:0030336~negative regulation of cell migration,GO:0030511~positive regulation of transforming growth factor beta receptor signaling pathway,GO:0030851~granulocyte differentiation,GO:0034405~response to fluid shear stress,GO:0035360~positive regulation of peroxisome proliferator activated receptor signaling pathway,GO:0035802~adrenal cortex formation,GO:0035914~skeletal muscle cell differentiation,GO:0043066~negative regulation of apoptotic process,GO:0043627~response to estrogen,GO:0045787~positive regulation of cell cycle,GO:0045892~negative regulation of transcription, DNA-templated,GO:0045893~positive regulation of transcription, DNA-templated,GO:0045944~positive regulation of transcription from RNA polymerase II promoter,GO:0046697~decidualization,GO:0048536~spleen development,GO:0048538~thymus development,GO:0048596~embryonic camera-type eye morphogenesis,GO:0048821~erythrocyte development,GO:0060136~embryonic process involved in female pregnancy,GO:0060349~bone morphogenesis,GO:0060412~ventricular septum morphogenesis,GO:0060971~embryonic heart tube left/right pattern formation,GO:0060972~left/right pattern formation,GO:0061156~pulmonary artery morphogenesis,GO:0061308~cardiac neural crest cell development involved in heart development,GO:0061428~negative regulation of transcription from RNA polymerase II promoter in response to hypoxia,GO:0070986~left/right axis specification,GO:1900164~nodal signaling pathway involved in determination of lateral mesoderm left/right asymmetry,GO:2000020~positive regulation of male gonad development,</p> |
| DCAF12 | DDB1 and CUL4 associated factor 12(DCAF12) | GO:0016567~protein ubiquitination,                                                                                                                                                                                                                                                                                                                                                                                                                                                                                                                                                                                                                                                                                                                                                                                                                                                                                                                                                                                                                                                                                                                                                                                                                                                                                                                                                                                                                                                                                                                                                                                                                                                                                                                                                                                                                                                                                                                                                                                                                                                                                                            |
| FXR1   | FMR1 autosomal homolog 1(FXR1)             | GO:0006915~apoptotic process,GO:0007517~muscle organ development,GO:0017148~negative regulation of translation,GO:0030154~cell differentiation,GO:2000637~positive regulation of gene silencing by miRNA,                                                                                                                                                                                                                                                                                                                                                                                                                                                                                                                                                                                                                                                                                                                                                                                                                                                                                                                                                                                                                                                                                                                                                                                                                                                                                                                                                                                                                                                                                                                                                                                                                                                                                                                                                                                                                                                                                                                                     |

|         |                                                                  |                                                                                                                                                                                                                                                                                                                                                                                                                                                                                                                                                                                                                                                                                                                                                                        |
|---------|------------------------------------------------------------------|------------------------------------------------------------------------------------------------------------------------------------------------------------------------------------------------------------------------------------------------------------------------------------------------------------------------------------------------------------------------------------------------------------------------------------------------------------------------------------------------------------------------------------------------------------------------------------------------------------------------------------------------------------------------------------------------------------------------------------------------------------------------|
| KDELRL1 | KDEL endoplasmic reticulum protein retention receptor 1(KDELRL1) | GO:0006621~protein retention in ER lumen,GO:0006886~intracellular protein transport,GO:0006888~ER to Golgi vesicle-mediated transport,GO:0006890~retrograde vesicle-mediated transport, Golgi to ER,                                                                                                                                                                                                                                                                                                                                                                                                                                                                                                                                                                   |
| LSM14A  | LSM14A, mRNA processing body assembly factor(LSM14A)             | GO:0006417~regulation of translation,GO:0007275~multicellular organism development,GO:0033962~cytoplasmic mRNA processing body assembly,GO:0039529~RIG-I signaling pathway,GO:0060340~positive regulation of type I interferon-mediated signaling pathway,                                                                                                                                                                                                                                                                                                                                                                                                                                                                                                             |
| MET     | MET proto-oncogene, receptor tyrosine kinase(MET)                | GO:0001886~endothelial cell morphogenesis,GO:0007165~signal transduction,GO:0007166~cell surface receptor signaling pathway,GO:0007169~transmembrane receptor protein tyrosine kinase signaling pathway,GO:0008283~cell proliferation,GO:0010507~negative regulation of autophagy,GO:0018108~peptidyl-tyrosine phosphorylation,GO:0045944~positive regulation of transcription from RNA polymerase II promoter,GO:0048012~hepatocyte growth factor receptor signaling pathway,GO:0048754~branching morphogenesis of an epithelial tube,GO:0050918~positive chemotaxis,GO:0071526~semaphorin-plexin signaling pathway,GO:1901299~negative regulation of hydrogen peroxide-mediated programmed cell death,GO:2001028~positive regulation of endothelial cell chemotaxis, |
| MYB     | MYB proto-oncogene, transcription factor(MYB)                    | GO:0000122~negative regulation of transcription from RNA polymerase II promoter,GO:0000278~mitotic cell cycle,GO:0006338~chromatin remodeling,GO:0006355~regulation of transcription, DNA-templated,GO:0006366~transcription from RNA polymerase II promoter,GO:0045624~positive regulation of T-helper cell differentiation,GO:0045892~negative regulation of transcription, DNA-templated,GO:0045893~positive regulation of transcription, DNA-templated,GO:0045944~positive regulation of transcription from RNA polymerase II promoter,GO:0051571~positive regulation of histone H3-K4 methylation,GO:0051574~positive regulation of histone H3-K9 methylation,                                                                                                    |
| NCKAP1  | NCK associated protein 1(NCKAP1)                                 | GO:0006915~apoptotic process,GO:0007417~central nervous system development,GO:0010592~positive regulation of lamellipodium assembly,GO:0016032~viral process,GO:0016601~Rac protein signal transduction,GO:0038096~Fc-gamma receptor signaling pathway involved in phagocytosis,GO:0048010~vascular endothelial growth factor receptor signaling pathway,GO:2000601~positive regulation of Arp2/3 complex-mediated actin nucleation,                                                                                                                                                                                                                                                                                                                                   |
| PRDM16  | PR/SET domain                                                    | GO:0000122~negative regulation of transcription from RNA polymerase II                                                                                                                                                                                                                                                                                                                                                                                                                                                                                                                                                                                                                                                                                                 |

|         |                                               |                                                                                                                                                                                                                                                                                                                                                                                                                                                                                                                                                                                                                                                                                                                                                                                                                                                                                              |
|---------|-----------------------------------------------|----------------------------------------------------------------------------------------------------------------------------------------------------------------------------------------------------------------------------------------------------------------------------------------------------------------------------------------------------------------------------------------------------------------------------------------------------------------------------------------------------------------------------------------------------------------------------------------------------------------------------------------------------------------------------------------------------------------------------------------------------------------------------------------------------------------------------------------------------------------------------------------------|
|         | 16(PRDM16)                                    | <p>promoter,GO:0006351~transcription, DNA-templated,GO:0006355~regulation of transcription, DNA-templated,GO:0022008~neurogenesis,GO:0030512~negative regulation of transforming growth factor beta receptor signaling pathway,GO:0030853~negative regulation of granulocyte differentiation,GO:0034968~histone lysine methylation,GO:0035019~somatic stem cell population maintenance,GO:0043457~regulation of cellular respiration,GO:0043586~tongue development,GO:0045892~negative regulation of transcription, DNA-templated,GO:0045893~positive regulation of transcription, DNA-templated,GO:0050872~white fat cell differentiation,GO:0050873~brown fat cell differentiation,GO:0060021~palate development,GO:0090336~positive regulation of brown fat cell differentiation,</p>                                                                                                     |
| RAB10   | RAB10, member RAS oncogene family(RAB10)      | <p>GO:0006893~Golgi to plasma membrane transport,GO:0007264~small GTPase mediated signal transduction,GO:0007409~axonogenesis,GO:0016192~vesicle-mediated transport,GO:0016197~endosomal transport,GO:0019882~antigen processing and presentation,GO:0030859~polarized epithelial cell differentiation,GO:0032869~cellular response to insulin stimulus,GO:0043001~Golgi to plasma membrane protein transport,GO:0045200~establishment of neuroblast polarity,GO:0061024~membrane organization,GO:0061467~basolateral protein localization,GO:0071786~endoplasmic reticulum tubular network organization,GO:0072659~protein localization to plasma membrane,GO:0090150~establishment of protein localization to membrane,GO:0097051~establishment of protein localization to endoplasmic reticulum membrane,GO:0098609~cell-cell adhesion,</p>                                               |
| ARHGDIA | Rho GDP dissociation inhibitor alpha(ARHGDIA) | <p>GO:0006928~movement of cell or subcellular component,GO:0007162~negative regulation of cell adhesion,GO:0007266~Rho protein signal transduction,GO:0008360~regulation of cell shape,GO:0030336~negative regulation of cell migration,GO:0032880~regulation of protein localization,GO:0035023~regulation of Rho protein signal transduction,GO:0043066~negative regulation of apoptotic process,GO:0043547~positive regulation of GTPase activity,GO:0050771~negative regulation of axonogenesis,GO:0050772~positive regulation of axonogenesis,GO:0051056~regulation of small GTPase mediated signal transduction,GO:0071260~cellular response to mechanical stimulus,GO:0071407~cellular response to organic cyclic compound,GO:0071461~cellular response to redox state,GO:0071526~semaphorin-plexin signaling pathway,GO:2000249~regulation of actin cytoskeleton reorganization,</p> |

|        |                                                      |                                                                                                                                                                                                                                                                                                                                                                                                                                                                                                                                                                                                                                                                                                                                                                                                                                                                                                                                                                                                                                                                                                                                                                                                                                                                                                                                                                                                                                                                                                                                                                                                                                                                                                                                                                                                                                                                                                                                                                                                                                                                                                                                                                                                                                                   |
|--------|------------------------------------------------------|---------------------------------------------------------------------------------------------------------------------------------------------------------------------------------------------------------------------------------------------------------------------------------------------------------------------------------------------------------------------------------------------------------------------------------------------------------------------------------------------------------------------------------------------------------------------------------------------------------------------------------------------------------------------------------------------------------------------------------------------------------------------------------------------------------------------------------------------------------------------------------------------------------------------------------------------------------------------------------------------------------------------------------------------------------------------------------------------------------------------------------------------------------------------------------------------------------------------------------------------------------------------------------------------------------------------------------------------------------------------------------------------------------------------------------------------------------------------------------------------------------------------------------------------------------------------------------------------------------------------------------------------------------------------------------------------------------------------------------------------------------------------------------------------------------------------------------------------------------------------------------------------------------------------------------------------------------------------------------------------------------------------------------------------------------------------------------------------------------------------------------------------------------------------------------------------------------------------------------------------------|
| SH3BP5 | SH3 domain binding protein 5(SH3BP5)                 | GO:0006469~negative regulation of protein kinase activity,GO:0007165~signal transduction,GO:0035556~intracellular signal transduction,GO:0061099~negative regulation of protein tyrosine kinase activity,                                                                                                                                                                                                                                                                                                                                                                                                                                                                                                                                                                                                                                                                                                                                                                                                                                                                                                                                                                                                                                                                                                                                                                                                                                                                                                                                                                                                                                                                                                                                                                                                                                                                                                                                                                                                                                                                                                                                                                                                                                         |
| SMAD7  | SMAD family member 7(SMAD7)                          | GO:0000122~negative regulation of transcription from RNA polymerase II promoter,GO:0001657~ureteric bud development,GO:0006351~transcription, DNA-templated,GO:0006355~regulation of transcription, DNA-templated,GO:0007179~transforming growth factor beta receptor signaling pathway,GO:0010717~regulation of epithelial to mesenchymal transition,GO:0010719~negative regulation of epithelial to mesenchymal transition,GO:0010801~negative regulation of peptidyl-threonine phosphorylation,GO:0010944~negative regulation of transcription by competitive promoter binding,GO:0017015~regulation of transforming growth factor beta receptor signaling pathway,GO:0022409~positive regulation of cell-cell adhesion,GO:0030336~negative regulation of cell migration,GO:0030509~BMP signaling pathway,GO:0030512~negative regulation of transforming growth factor beta receptor signaling pathway,GO:0030514~negative regulation of BMP signaling pathway,GO:0031397~negative regulation of protein ubiquitination,GO:0031398~positive regulation of protein ubiquitination,GO:0032436~positive regulation of proteasomal ubiquitin-dependent protein catabolic process,GO:0032925~regulation of activin receptor signaling pathway,GO:0033137~negative regulation of peptidyl-serine phosphorylation,GO:0034333~adherens junction assembly,GO:0034616~response to laminar fluid shear stress,GO:0034629~cellular protein complex localization,GO:0043433~negative regulation of sequence-specific DNA binding transcription factor activity,GO:0045944~positive regulation of transcription from RNA polymerase II promoter,GO:0048844~artery morphogenesis,GO:0050821~protein stabilization,GO:0051444~negative regulation of ubiquitin-protein transferase activity,GO:0055010~ventricular cardiac muscle tissue morphogenesis,GO:0055117~regulation of cardiac muscle contraction,GO:0060373~regulation of ventricular cardiac muscle cell membrane depolarization,GO:0060389~pathway-restricted SMAD protein phosphorylation,GO:0060394~negative regulation of pathway-restricted SMAD protein phosphorylation,GO:0060412~ventricular septum morphogenesis,GO:0071560~cellular response to transforming growth factor beta stimulus, |
| TAF15  | TATA-box binding protein associated factor 15(TAF15) | GO:0045893~positive regulation of transcription, DNA-templated,                                                                                                                                                                                                                                                                                                                                                                                                                                                                                                                                                                                                                                                                                                                                                                                                                                                                                                                                                                                                                                                                                                                                                                                                                                                                                                                                                                                                                                                                                                                                                                                                                                                                                                                                                                                                                                                                                                                                                                                                                                                                                                                                                                                   |

|         |                                                               |                                                                                                                                                                                                                                                                                                                                                                                                                                                                                                                                                                                                                                                                                                                                                                                                                                                                                                                                                                                                                                                                                                                                                                                                                                                                                                                                                                                                                                                                                                                                                                                                                                                                                                                                                                                                                                                                                                                                                                                                                                                                             |
|---------|---------------------------------------------------------------|-----------------------------------------------------------------------------------------------------------------------------------------------------------------------------------------------------------------------------------------------------------------------------------------------------------------------------------------------------------------------------------------------------------------------------------------------------------------------------------------------------------------------------------------------------------------------------------------------------------------------------------------------------------------------------------------------------------------------------------------------------------------------------------------------------------------------------------------------------------------------------------------------------------------------------------------------------------------------------------------------------------------------------------------------------------------------------------------------------------------------------------------------------------------------------------------------------------------------------------------------------------------------------------------------------------------------------------------------------------------------------------------------------------------------------------------------------------------------------------------------------------------------------------------------------------------------------------------------------------------------------------------------------------------------------------------------------------------------------------------------------------------------------------------------------------------------------------------------------------------------------------------------------------------------------------------------------------------------------------------------------------------------------------------------------------------------------|
| TWISTNB | TWIST<br>neighbor(TWISTNB)                                    | GO:0006361~transcription initiation from RNA polymerase I<br>promoter,GO:0006362~transcription elongation from RNA polymerase I<br>promoter,GO:0006363~termination of RNA polymerase I<br>transcription,GO:0045815~positive regulation of gene expression, epigenetic,                                                                                                                                                                                                                                                                                                                                                                                                                                                                                                                                                                                                                                                                                                                                                                                                                                                                                                                                                                                                                                                                                                                                                                                                                                                                                                                                                                                                                                                                                                                                                                                                                                                                                                                                                                                                      |
| WIPI2   | WD repeat domain,<br>phosphoinositide<br>interacting 2(WIPI2) | GO:0000045~autophagosome<br>assembly,GO:0000422~mitophagy,GO:0006497~protein<br>lipidation,GO:0016236~macroautophagy,GO:0034497~protein localization to pre-<br>autophagosomal<br>structure,GO:0044804~nucleophagy,GO:0097352~autophagosome maturation,                                                                                                                                                                                                                                                                                                                                                                                                                                                                                                                                                                                                                                                                                                                                                                                                                                                                                                                                                                                                                                                                                                                                                                                                                                                                                                                                                                                                                                                                                                                                                                                                                                                                                                                                                                                                                     |
| XBP1    | X-box binding protein<br>1(XBP1)                              | GO:0000122~negative regulation of transcription from RNA polymerase II<br>promoter,GO:0001525~angiogenesis,GO:0001889~liver<br>development,GO:0001934~positive regulation of protein<br>phosphorylation,GO:0001935~endothelial cell proliferation,GO:0002639~positive<br>regulation of immunoglobulin production,GO:0006366~transcription from RNA<br>polymerase II promoter,GO:0006511~ubiquitin-dependent protein catabolic<br>process,GO:0006633~fatty acid biosynthetic<br>process,GO:0006914~autophagy,GO:0006955~immune<br>response,GO:0006990~positive regulation of transcription from RNA polymerase<br>II promoter involved in unfolded protein response,GO:0006996~organelle<br>organization,GO:0007517~muscle organ development,GO:0008284~positive<br>regulation of cell proliferation,GO:0010506~regulation of<br>autophagy,GO:0010508~positive regulation of autophagy,GO:0010832~negative<br>regulation of myotube differentiation,GO:0014065~phosphatidylinositol 3-kinase<br>signaling,GO:0015031~protein transport,GO:0016049~cell<br>growth,GO:0030335~positive regulation of cell migration,GO:0030512~negative<br>regulation of transforming growth factor beta receptor signaling<br>pathway,GO:0030968~endoplasmic reticulum unfolded protein<br>response,GO:0031017~exocrine pancreas development,GO:0031062~positive<br>regulation of histone methylation,GO:0031647~regulation of protein<br>stability,GO:0031648~protein destabilization,GO:0031670~cellular response to<br>nutrient,GO:0032008~positive regulation of TOR signaling,GO:0032869~cellular<br>response to insulin stimulus,GO:0034599~cellular response to oxidative<br>stress,GO:0034976~response to endoplasmic reticulum<br>stress,GO:0035356~cellular triglyceride homeostasis,GO:0035470~positive<br>regulation of vascular wound healing,GO:0035924~cellular response to vascular<br>endothelial growth factor stimulus,GO:0036498~IRE1-mediated unfolded protein<br>response,GO:0036500~ATF6-mediated unfolded protein<br>response,GO:0042149~cellular response to glucose |

|  |                                                                                                                                                                                                                                                                                                                                                                                                                                                                                                                                                                                                                                                                                                                                                                                                                                                                                                                                                                                                                                                                                                                                                                                                                                                                                                                                                                                                                                                                                                                                                                                                                                                                                                                                                                                                                                                                                                                                                                                                                                                                                                                                                                                                                                                                                                                                                                                                                                                                                                                                                                                                                                                                                                                              |
|--|------------------------------------------------------------------------------------------------------------------------------------------------------------------------------------------------------------------------------------------------------------------------------------------------------------------------------------------------------------------------------------------------------------------------------------------------------------------------------------------------------------------------------------------------------------------------------------------------------------------------------------------------------------------------------------------------------------------------------------------------------------------------------------------------------------------------------------------------------------------------------------------------------------------------------------------------------------------------------------------------------------------------------------------------------------------------------------------------------------------------------------------------------------------------------------------------------------------------------------------------------------------------------------------------------------------------------------------------------------------------------------------------------------------------------------------------------------------------------------------------------------------------------------------------------------------------------------------------------------------------------------------------------------------------------------------------------------------------------------------------------------------------------------------------------------------------------------------------------------------------------------------------------------------------------------------------------------------------------------------------------------------------------------------------------------------------------------------------------------------------------------------------------------------------------------------------------------------------------------------------------------------------------------------------------------------------------------------------------------------------------------------------------------------------------------------------------------------------------------------------------------------------------------------------------------------------------------------------------------------------------------------------------------------------------------------------------------------------------|
|  | <p>starvation,GO:0042632~cholesterol homeostasis,GO:0042993~positive regulation of transcription factor import into nucleus,GO:0043066~negative regulation of apoptotic process,GO:0045348~positive regulation of MHC class II biosynthetic process,GO:0045579~positive regulation of B cell differentiation,GO:0045582~positive regulation of T cell differentiation,GO:0045600~positive regulation of fat cell differentiation,GO:0045766~positive regulation of angiogenesis,GO:0045944~positive regulation of transcription from RNA polymerase II promoter,GO:0048010~vascular endothelial growth factor receptor signaling pathway,GO:0048666~neuron development,GO:0051024~positive regulation of immunoglobulin secretion,GO:0051897~positive regulation of protein kinase B signaling,GO:0055089~fatty acid homeostasis,GO:0055092~sterol homeostasis,GO:0060394~negative regulation of pathway-restricted SMAD protein phosphorylation,GO:0060612~adipose tissue development,GO:0060691~epithelial cell maturation involved in salivary gland development,GO:0070059~intrinsic apoptotic signaling pathway in response to endoplasmic reticulum stress,GO:0070373~negative regulation of ERK1 and ERK2 cascade,GO:0071222~cellular response to lipopolysaccharide,GO:0071230~cellular response to amino acid stimulus,GO:0071332~cellular response to fructose stimulus,GO:0071333~cellular response to glucose stimulus,GO:0071353~cellular response to interleukin-4,GO:0071375~cellular response to peptide hormone stimulus,GO:0071498~cellular response to fluid shear stress,GO:0071499~cellular response to laminar fluid shear stress,GO:1900100~positive regulation of plasma cell differentiation,GO:1900102~negative regulation of endoplasmic reticulum unfolded protein response,GO:1900103~positive regulation of endoplasmic reticulum unfolded protein response,GO:1900413~positive regulation of phospholipid biosynthetic process by positive regulation of transcription from RNA polymerase II promoter,GO:1901800~positive regulation of proteasomal protein catabolic process,GO:1901985~positive regulation of protein acetylation,GO:1902236~negative regulation of endoplasmic reticulum stress-induced intrinsic apoptotic signaling pathway,GO:1903071~positive regulation of ER-associated ubiquitin-dependent protein catabolic process,GO:1903489~positive regulation of lactation,GO:1904707~positive regulation of vascular smooth muscle cell proliferation,GO:1904754~positive regulation of vascular associated smooth muscle cell migration,GO:1990418~response to insulin-like growth factor stimulus,GO:1990440~positive regulation of transcription from RNA polymerase</p> |
|--|------------------------------------------------------------------------------------------------------------------------------------------------------------------------------------------------------------------------------------------------------------------------------------------------------------------------------------------------------------------------------------------------------------------------------------------------------------------------------------------------------------------------------------------------------------------------------------------------------------------------------------------------------------------------------------------------------------------------------------------------------------------------------------------------------------------------------------------------------------------------------------------------------------------------------------------------------------------------------------------------------------------------------------------------------------------------------------------------------------------------------------------------------------------------------------------------------------------------------------------------------------------------------------------------------------------------------------------------------------------------------------------------------------------------------------------------------------------------------------------------------------------------------------------------------------------------------------------------------------------------------------------------------------------------------------------------------------------------------------------------------------------------------------------------------------------------------------------------------------------------------------------------------------------------------------------------------------------------------------------------------------------------------------------------------------------------------------------------------------------------------------------------------------------------------------------------------------------------------------------------------------------------------------------------------------------------------------------------------------------------------------------------------------------------------------------------------------------------------------------------------------------------------------------------------------------------------------------------------------------------------------------------------------------------------------------------------------------------------|

|         |                                                      |                                                                                                                                                                                                                                                                                                                                                                                                                                                                                                                                                                                                                                                                                                                                                                                                                                                                                                                                                                                                                                                                                                                                                                                                                                                                                                                                                                                                                                                                                                                                                                                                                                                                                                                                                                                                                                                                                                                                                                                                                                                                                                                                                                                                                                                                                            |
|---------|------------------------------------------------------|--------------------------------------------------------------------------------------------------------------------------------------------------------------------------------------------------------------------------------------------------------------------------------------------------------------------------------------------------------------------------------------------------------------------------------------------------------------------------------------------------------------------------------------------------------------------------------------------------------------------------------------------------------------------------------------------------------------------------------------------------------------------------------------------------------------------------------------------------------------------------------------------------------------------------------------------------------------------------------------------------------------------------------------------------------------------------------------------------------------------------------------------------------------------------------------------------------------------------------------------------------------------------------------------------------------------------------------------------------------------------------------------------------------------------------------------------------------------------------------------------------------------------------------------------------------------------------------------------------------------------------------------------------------------------------------------------------------------------------------------------------------------------------------------------------------------------------------------------------------------------------------------------------------------------------------------------------------------------------------------------------------------------------------------------------------------------------------------------------------------------------------------------------------------------------------------------------------------------------------------------------------------------------------------|
|         |                                                      | <p>II promoter in response to endoplasmic reticulum stress,GO:2000347~positive regulation of hepatocyte proliferation,GO:2000353~positive regulation of endothelial cell apoptotic process,GO:2000778~positive regulation of interleukin-6 secretion,</p>                                                                                                                                                                                                                                                                                                                                                                                                                                                                                                                                                                                                                                                                                                                                                                                                                                                                                                                                                                                                                                                                                                                                                                                                                                                                                                                                                                                                                                                                                                                                                                                                                                                                                                                                                                                                                                                                                                                                                                                                                                  |
| ZFP36L1 | <p>ZFP36 ring finger protein like<br/>1(ZFP36L1)</p> | <p>GO:0000165~MAPK cascade,GO:0000288~nuclear-transcribed mRNA catabolic process, deadenylation-dependent decay,GO:0001570~vasculogenesis,GO:0003342~proepicardium development,GO:0006355~regulation of transcription, DNA-templated,GO:0006397~mRNA processing,GO:0006417~regulation of translation,GO:0006915~apoptotic process,GO:0007507~heart development,GO:0008283~cell proliferation,GO:0009611~response to wounding,GO:0010468~regulation of gene expression,GO:0010837~regulation of keratinocyte proliferation,GO:0014065~phosphatidylinositol 3-kinase signaling,GO:0021915~neural tube development,GO:0031086~nuclear-transcribed mRNA catabolic process, deadenylation-independent decay,GO:0031440~regulation of mRNA 3'-end processing,GO:0032869~cellular response to insulin stimulus,GO:0033077~T cell differentiation in thymus,GO:0035264~multicellular organism growth,GO:0038066~p38MAPK cascade,GO:0043488~regulation of mRNA stability,GO:0043491~protein kinase B signaling,GO:0044344~cellular response to fibroblast growth factor stimulus,GO:0045577~regulation of B cell differentiation,GO:0045600~positive regulation of fat cell differentiation,GO:0045616~regulation of keratinocyte differentiation,GO:0045647~negative regulation of erythrocyte differentiation,GO:0045657~positive regulation of monocyte differentiation,GO:0045661~regulation of myoblast differentiation,GO:0048382~mesendoderm development,GO:0051028~mRNA transport,GO:0060710~chorio-allantoic fusion,GO:0060712~spongiotrophoblast layer development,GO:0061158~3'-UTR-mediated mRNA destabilization,GO:0070371~ERK1 and ERK2 cascade,GO:0071320~cellular response to cAMP,GO:0071356~cellular response to tumor necrosis factor,GO:0071364~cellular response to epidermal growth factor stimulus,GO:0071375~cellular response to peptide hormone stimulus,GO:0071385~cellular response to glucocorticoid stimulus,GO:0071456~cellular response to hypoxia,GO:0071472~cellular response to salt stress,GO:0071560~cellular response to transforming growth factor beta stimulus,GO:0072091~regulation of stem cell proliferation,GO:0097403~cellular response to raffinose,GO:1900153~positive regulation of nuclear-transcribed mRNA catabolic process, deadenylation-</p> |

|         |                                                                                         |                                                                                                                                                                                                                                                                                                                                                                                                                                                                                            |
|---------|-----------------------------------------------------------------------------------------|--------------------------------------------------------------------------------------------------------------------------------------------------------------------------------------------------------------------------------------------------------------------------------------------------------------------------------------------------------------------------------------------------------------------------------------------------------------------------------------------|
|         |                                                                                         | dependent decay,GO:1901991~negative regulation of mitotic cell cycle phase transition,GO:1902172~regulation of keratinocyte apoptotic process,GO:1904582~positive regulation of intracellular mRNA localization,GO:1904628~cellular response to phorbol 13-acetate 12-myristate,                                                                                                                                                                                                           |
| APPL1   | adaptor protein, phosphotyrosine interacting with PH domain and leucine zipper 1(APPL1) | GO:0007049~cell cycle,GO:0007165~signal transduction,GO:0008283~cell proliferation,GO:0008286~insulin receptor signaling pathway,GO:0046324~regulation of glucose import,GO:0090003~regulation of establishment of protein localization to plasma membrane,GO:0097192~extrinsic apoptotic signaling pathway in absence of ligand,                                                                                                                                                          |
| ADGRL2  | adhesion G protein-coupled receptor L2(ADGRL2)                                          | GO:0007166~cell surface receptor signaling pathway,GO:0007186~G-protein coupled receptor signaling pathway,                                                                                                                                                                                                                                                                                                                                                                                |
| AMOTL2  | angiomotin like 2(AMOTL2)                                                               | GO:0016055~Wnt signaling pathway,GO:0035329~hippo signaling,                                                                                                                                                                                                                                                                                                                                                                                                                               |
| ANLN    | anillin actin binding protein(ANLN)                                                     | GO:0000281~mitotic cytokinesis,GO:0000921~septin ring assembly,GO:0002244~hematopoietic progenitor cell differentiation,GO:0007067~mitotic nuclear division,GO:0007096~regulation of exit from mitosis,GO:0090521~glomerular visceral epithelial cell migration,GO:0098609~cell-cell adhesion,                                                                                                                                                                                             |
| ANKRD27 | ankyrin repeat domain 27(ANKRD27)                                                       | GO:0015031~protein transport,GO:0035544~negative regulation of SNARE complex assembly,GO:0035646~endosome to melanosome transport,GO:0043547~positive regulation of GTPase activity,GO:0045022~early endosome to late endosome transport,GO:0048812~neuron projection morphogenesis,GO:0050775~positive regulation of dendrite morphogenesis,GO:1990126~retrograde transport, endosome to plasma membrane,                                                                                 |
| ARRDC3  | arrestin domain containing 3(ARRDC3)                                                    | GO:0001659~temperature homeostasis,GO:0007165~signal transduction,GO:0031651~negative regulation of heat generation,GO:0043588~skin development,GO:0044252~negative regulation of multicellular organismal metabolic process,GO:0051443~positive regulation of ubiquitin-protein transferase activity,GO:0060613~fat pad development,GO:0071879~positive regulation of adrenergic receptor signaling pathway,GO:0090327~negative regulation of locomotion involved in locomotory behavior, |
| BCAT2   | branched chain amino acid transaminase 2(BCAT2)                                         | GO:0006532~aspartate biosynthetic process,GO:0006550~isoleucine catabolic process,GO:0008152~metabolic process,GO:0008652~cellular amino acid biosynthetic process,GO:0009082~branched-chain amino acid biosynthetic process,GO:0009083~branched-chain amino acid catabolic                                                                                                                                                                                                                |

|         |                                                                           |                                                                                                                                                                                                                                                                                                                                                                                                                                                                                                                                                                                                                                                                                                                                                                                                                                                                                                                                                                                                                                                                                  |
|---------|---------------------------------------------------------------------------|----------------------------------------------------------------------------------------------------------------------------------------------------------------------------------------------------------------------------------------------------------------------------------------------------------------------------------------------------------------------------------------------------------------------------------------------------------------------------------------------------------------------------------------------------------------------------------------------------------------------------------------------------------------------------------------------------------------------------------------------------------------------------------------------------------------------------------------------------------------------------------------------------------------------------------------------------------------------------------------------------------------------------------------------------------------------------------|
|         |                                                                           | process,GO:0009098~leucine biosynthetic process,GO:0009099~valine biosynthetic process,GO:0010817~regulation of hormone levels,                                                                                                                                                                                                                                                                                                                                                                                                                                                                                                                                                                                                                                                                                                                                                                                                                                                                                                                                                  |
| CAMSAP2 | calmodulin regulated spectrin associated protein family member 2(CAMSAP2) | GO:0000226~microtubule cytoskeleton organization,GO:0031175~neuron projection development,GO:0033043~regulation of organelle organization,                                                                                                                                                                                                                                                                                                                                                                                                                                                                                                                                                                                                                                                                                                                                                                                                                                                                                                                                       |
| CHST10  | carbohydrate sulfotransferase 10(CHST10)                                  | GO:0007155~cell adhesion,GO:0016051~carbohydrate biosynthetic process,                                                                                                                                                                                                                                                                                                                                                                                                                                                                                                                                                                                                                                                                                                                                                                                                                                                                                                                                                                                                           |
| CFL1    | cofilin 1(CFL1)                                                           | GO:0006606~protein import into nucleus,GO:0007010~cytoskeleton organization,GO:0007266~Rho protein signal transduction,GO:0009615~response to virus,GO:0022604~regulation of cell morphogenesis,GO:0030030~cell projection organization,GO:0030036~actin cytoskeleton organization,GO:0030042~actin filament depolymerization,GO:0043066~negative regulation of apoptotic process,GO:0044794~positive regulation by host of viral process,GO:0045792~negative regulation of cell size,GO:0061001~regulation of dendritic spine morphogenesis,                                                                                                                                                                                                                                                                                                                                                                                                                                                                                                                                    |
| CNNM3   | cyclin and CBS domain divalent metal cation transport mediator 3(CNNM3)   | GO:0006811~ion transport,                                                                                                                                                                                                                                                                                                                                                                                                                                                                                                                                                                                                                                                                                                                                                                                                                                                                                                                                                                                                                                                        |
| DUSP1   | dual specificity phosphatase 1(DUSP1)                                     | GO:0000188~inactivation of MAPK activity,GO:0001706~endoderm formation,GO:0006979~response to oxidative stress,GO:0009416~response to light stimulus,GO:0032355~response to estradiol,GO:0032526~response to retinoic acid,GO:0032870~cellular response to hormone stimulus,GO:0033574~response to testosterone,GO:0035335~peptidyl-tyrosine dephosphorylation,GO:0035556~intracellular signal transduction,GO:0035970~peptidyl-threonine dephosphorylation,GO:0042542~response to hydrogen peroxide,GO:0042981~regulation of apoptotic process,GO:0043065~positive regulation of apoptotic process,GO:0043066~negative regulation of apoptotic process,GO:0043407~negative regulation of MAP kinase activity,GO:0043409~negative regulation of MAPK cascade,GO:0051384~response to glucocorticoid,GO:0051447~negative regulation of meiotic cell cycle,GO:0051591~response to cAMP,GO:0051592~response to calcium ion,GO:0070373~negative regulation of ERK1 and ERK2 cascade,GO:0071850~mitotic cell cycle arrest,GO:0090266~regulation of mitotic cell cycle spindle assembly |

|         |                                                       |                                                                                                                                                                                                                                                                                                                                                                                                                                                                                                                                                                                                                                                                                                                                                                                                                                                                                                                                                                                                                                                                                                                                                                                                                                   |
|---------|-------------------------------------------------------|-----------------------------------------------------------------------------------------------------------------------------------------------------------------------------------------------------------------------------------------------------------------------------------------------------------------------------------------------------------------------------------------------------------------------------------------------------------------------------------------------------------------------------------------------------------------------------------------------------------------------------------------------------------------------------------------------------------------------------------------------------------------------------------------------------------------------------------------------------------------------------------------------------------------------------------------------------------------------------------------------------------------------------------------------------------------------------------------------------------------------------------------------------------------------------------------------------------------------------------|
|         |                                                       | checkpoint,GO:2000279~negative regulation of DNA biosynthetic process,                                                                                                                                                                                                                                                                                                                                                                                                                                                                                                                                                                                                                                                                                                                                                                                                                                                                                                                                                                                                                                                                                                                                                            |
| EVI5    | ecotropic viral integration site 5(EVI5)              | GO:0006886~intracellular protein transport,GO:0007049~cell cycle,GO:0007275~multicellular organism development,GO:0008283~cell proliferation,GO:0031338~regulation of vesicle fusion,GO:0042147~retrograde transport, endosome to Golgi,GO:0051301~cell division,GO:0090630~activation of GTPase activity,GO:1902017~regulation of cilium assembly,                                                                                                                                                                                                                                                                                                                                                                                                                                                                                                                                                                                                                                                                                                                                                                                                                                                                               |
| ELL2    | elongation factor for RNA polymerase II 2(ELL2)       | GO:0006355~regulation of transcription, DNA-templated,GO:0006368~transcription elongation from RNA polymerase II promoter,GO:0042795~snRNA transcription from RNA polymerase II promoter,                                                                                                                                                                                                                                                                                                                                                                                                                                                                                                                                                                                                                                                                                                                                                                                                                                                                                                                                                                                                                                         |
| ELL     | elongation factor for RNA polymerase II(ELL)          | GO:0001701~in utero embryonic development,GO:0006366~transcription from RNA polymerase II promoter,GO:0006368~transcription elongation from RNA polymerase II promoter,GO:0010923~negative regulation of phosphatase activity,GO:0032786~positive regulation of DNA-templated transcription, elongation,GO:0032968~positive regulation of transcription elongation from RNA polymerase II promoter,GO:0042795~snRNA transcription from RNA polymerase II promoter,GO:0042796~snRNA transcription from RNA polymerase III promoter,GO:0045945~positive regulation of transcription from RNA polymerase III promoter,                                                                                                                                                                                                                                                                                                                                                                                                                                                                                                                                                                                                               |
| FAM222B | family with sequence similarity 222 member B(FAM222B) |                                                                                                                                                                                                                                                                                                                                                                                                                                                                                                                                                                                                                                                                                                                                                                                                                                                                                                                                                                                                                                                                                                                                                                                                                                   |
| FAM49B  | family with sequence similarity 49 member B(FAM49B)   |                                                                                                                                                                                                                                                                                                                                                                                                                                                                                                                                                                                                                                                                                                                                                                                                                                                                                                                                                                                                                                                                                                                                                                                                                                   |
| FRS2    | fibroblast growth factor receptor substrate 2(FRS2)   | GO:0000165~MAPK cascade,GO:0000186~activation of MAPKK activity,GO:0000187~activation of MAPK activity,GO:0001702~gastrulation with mouth forming second,GO:0001759~organ induction,GO:0003281~ventricular septum development,GO:0007185~transmembrane receptor protein tyrosine phosphatase signaling pathway,GO:0007186~G-protein coupled receptor signaling pathway,GO:0007405~neuroblast proliferation,GO:0008543~fibroblast growth factor receptor signaling pathway,GO:0008595~anterior/posterior axis specification, embryo,GO:0014066~regulation of phosphatidylinositol 3-kinase signaling,GO:0030900~forebrain development,GO:0036092~phosphatidylinositol-3-phosphate biosynthetic process,GO:0042981~regulation of apoptotic process,GO:0043547~positive regulation of GTPase activity,GO:0046619~optic placode formation involved in camera-type eye formation,GO:0046854~phosphatidylinositol phosphorylation,GO:0048015~phosphatidylinositol-mediated signaling,GO:0050678~regulation of epithelial cell proliferation,GO:0060527~prostate epithelial cord arborization involved in prostate glandular acinus morphogenesis,GO:0070307~lens fiber cell development,GO:0070372~regulation of ERK1 and ERK2 cascade, |

|        |                                                   |                                                                                                                                                                                                                                                                                                                                                                                                                                                                                                                                                                                                                                                                                                                                                                                                                                                                                                                                                                                                                                                                                                                                                                   |
|--------|---------------------------------------------------|-------------------------------------------------------------------------------------------------------------------------------------------------------------------------------------------------------------------------------------------------------------------------------------------------------------------------------------------------------------------------------------------------------------------------------------------------------------------------------------------------------------------------------------------------------------------------------------------------------------------------------------------------------------------------------------------------------------------------------------------------------------------------------------------------------------------------------------------------------------------------------------------------------------------------------------------------------------------------------------------------------------------------------------------------------------------------------------------------------------------------------------------------------------------|
| FN1    | fibronectin 1(FN1)                                | GO:0001525~angiogenesis,GO:0001932~regulation of protein phosphorylation,GO:0002576~platelet degranulation,GO:0006953~acute-phase response,GO:0007044~cell-substrate junction assembly,GO:0007155~cell adhesion,GO:0007161~calcium-independent cell-matrix adhesion,GO:0008284~positive regulation of cell proliferation,GO:0008360~regulation of cell shape,GO:0009611~response to wounding,GO:0010628~positive regulation of gene expression,GO:0010952~positive regulation of peptidase activity,GO:0018149~peptide cross-linking,GO:0022617~extracellular matrix disassembly,GO:0030198~extracellular matrix organization,GO:0033622~integrin activation,GO:0034446~substrate adhesion-dependent cell spreading,GO:0035987~endodermal cell differentiation,GO:0042060~wound healing,GO:0045773~positive regulation of axon extension,GO:0048146~positive regulation of fibroblast proliferation,GO:0050900~leukocyte migration,GO:0070372~regulation of ERK1 and ERK2 cascade,GO:1904237~positive regulation of substrate-dependent cell migration, cell attachment to substrate,GO:2001202~negative regulation of transforming growth factor-beta secretion, |
| FNDC3B | fibronectin type III domain containing 3B(FNDC3B) |                                                                                                                                                                                                                                                                                                                                                                                                                                                                                                                                                                                                                                                                                                                                                                                                                                                                                                                                                                                                                                                                                                                                                                   |
| FOXF2  | forkhead box F2(FOXF2)                            | GO:0001837~epithelial to mesenchymal transition,GO:0006366~transcription from RNA polymerase II promoter,GO:0030198~extracellular matrix organization,GO:0042249~establishment of planar polarity of embryonic epithelium,GO:0045892~negative regulation of transcription, DNA-templated,GO:0045893~positive regulation of transcription, DNA-templated,GO:0045944~positive regulation of transcription from RNA polymerase II promoter,GO:0048566~embryonic digestive tract development,GO:0048596~embryonic camera-type eye morphogenesis,GO:0048806~genitalia development,GO:0060021~palate development,                                                                                                                                                                                                                                                                                                                                                                                                                                                                                                                                                       |
| FOXN2  | forkhead box N2(FOXN2)                            | GO:0006351~transcription, DNA-templated,GO:0030154~cell differentiation,GO:0035914~skeletal muscle cell differentiation,GO:0045893~positive regulation of transcription, DNA-templated,                                                                                                                                                                                                                                                                                                                                                                                                                                                                                                                                                                                                                                                                                                                                                                                                                                                                                                                                                                           |
| GXYLT1 | glucoside xylosyltransferase 1(GXYLT1)            | GO:0016266~O-glycan processing,GO:0030203~glycosaminoglycan metabolic process,                                                                                                                                                                                                                                                                                                                                                                                                                                                                                                                                                                                                                                                                                                                                                                                                                                                                                                                                                                                                                                                                                    |
| QSER1  | glutamine and serine rich 1(QSER1)                |                                                                                                                                                                                                                                                                                                                                                                                                                                                                                                                                                                                                                                                                                                                                                                                                                                                                                                                                                                                                                                                                                                                                                                   |
| GRB2   | growth factor receptor bound protein 2(GRB2)      | GO:0000165~MAPK cascade,GO:0007173~epidermal growth factor receptor signaling pathway,GO:0007265~Ras protein signal                                                                                                                                                                                                                                                                                                                                                                                                                                                                                                                                                                                                                                                                                                                                                                                                                                                                                                                                                                                                                                               |

|      |                                              |                                                                                                                                                                                                                                                                                                                                                                                                                                                                                                                                                                                                                                                                                                                                                                                                                                                                                                                                                                                                                                                                                                                                                                                                                                                                                                                                                                                                                                                   |
|------|----------------------------------------------|---------------------------------------------------------------------------------------------------------------------------------------------------------------------------------------------------------------------------------------------------------------------------------------------------------------------------------------------------------------------------------------------------------------------------------------------------------------------------------------------------------------------------------------------------------------------------------------------------------------------------------------------------------------------------------------------------------------------------------------------------------------------------------------------------------------------------------------------------------------------------------------------------------------------------------------------------------------------------------------------------------------------------------------------------------------------------------------------------------------------------------------------------------------------------------------------------------------------------------------------------------------------------------------------------------------------------------------------------------------------------------------------------------------------------------------------------|
|      |                                              | <p>transduction,GO:0007267~cell-cell signaling,GO:0007411~axon guidance,GO:0007568~aging,GO:0008286~insulin receptor signaling pathway,GO:0008543~fibroblast growth factor receptor signaling pathway,GO:0009967~positive regulation of signal transduction,GO:0014066~regulation of phosphatidylinositol 3-kinase signaling,GO:0016032~viral process,GO:0030154~cell differentiation,GO:0030838~positive regulation of actin filament polymerization,GO:0031295~T cell costimulation,GO:0031623~receptor internalization,GO:0036092~phosphatidylinositol-3-phosphate biosynthetic process,GO:0038095~Fc-epsilon receptor signaling pathway,GO:0038096~Fc-gamma receptor signaling pathway involved in phagocytosis,GO:0038128~ERBB2 signaling pathway,GO:0042059~negative regulation of epidermal growth factor receptor signaling pathway,GO:0042770~signal transduction in response to DNA damage,GO:0043408~regulation of MAPK cascade,GO:0043547~positive regulation of GTPase activity,GO:0046854~phosphatidylinositol phosphorylation,GO:0048015~phosphatidylinositol-mediated signaling,GO:0048646~anatomical structure formation involved in morphogenesis,GO:0050900~leukocyte migration,GO:0051291~protein heterooligomerization,GO:0060670~branching involved in labyrinthine layer morphogenesis,GO:0071479~cellular response to ionizing radiation,GO:2000379~positive regulation of reactive oxygen species metabolic process,</p> |
| HES1 | hes family bHLH transcription factor 1(HES1) | <p>GO:0000122~negative regulation of transcription from RNA polymerase II promoter,GO:0001889~liver development,GO:0003143~embryonic heart tube morphogenesis,GO:0003151~outflow tract morphogenesis,GO:0003266~regulation of secondary heart field cardioblast proliferation,GO:0003281~ventricular septum development,GO:0006351~transcription, DNA-templated,GO:0006355~regulation of transcription, DNA-templated,GO:0006461~protein complex assembly,GO:0007155~cell adhesion,GO:0007219~Notch signaling pathway,GO:0007224~smoothened signaling pathway,GO:0007262~STAT protein import into nucleus,GO:0007399~nervous system development,GO:0008284~positive regulation of cell proliferation,GO:0016477~cell migration,GO:0021537~telencephalon development,GO:0021555~midbrain-hindbrain boundary morphogenesis,GO:0021557~oculomotor nerve development,GO:0021558~trochlear nerve development,GO:0021575~hindbrain</p>                                                                                                                                                                                                                                                                                                                                                                                                                                                                                                                  |

|  |  |                                                                                                                                                                                                                                                                                                                                                                                                                                                                                                                                                                                                                                                                                                                                                                                                                                                                                                                                                                                                                                                                                                                                                                                                                                                                                                                                                                                                                                                                                                                                                                                                                                                                                                                                                                                                                                                                                                                                                                                                                                                                                                                                                                                                                                                                                                                                                                                                                                                                                                                                                                                                      |
|--|--|------------------------------------------------------------------------------------------------------------------------------------------------------------------------------------------------------------------------------------------------------------------------------------------------------------------------------------------------------------------------------------------------------------------------------------------------------------------------------------------------------------------------------------------------------------------------------------------------------------------------------------------------------------------------------------------------------------------------------------------------------------------------------------------------------------------------------------------------------------------------------------------------------------------------------------------------------------------------------------------------------------------------------------------------------------------------------------------------------------------------------------------------------------------------------------------------------------------------------------------------------------------------------------------------------------------------------------------------------------------------------------------------------------------------------------------------------------------------------------------------------------------------------------------------------------------------------------------------------------------------------------------------------------------------------------------------------------------------------------------------------------------------------------------------------------------------------------------------------------------------------------------------------------------------------------------------------------------------------------------------------------------------------------------------------------------------------------------------------------------------------------------------------------------------------------------------------------------------------------------------------------------------------------------------------------------------------------------------------------------------------------------------------------------------------------------------------------------------------------------------------------------------------------------------------------------------------------------------------|
|  |  | <p>morphogenesis,GO:0021861~forebrain radial glial cell</p> <p>differentiation,GO:0021984~adenohypophysis development,GO:0030324~lung development,GO:0030513~positive regulation of BMP signaling pathway,GO:0030901~midbrain development,GO:0031016~pancreas development,GO:0035019~somatic stem cell population</p> <p>maintenance,GO:0035910~ascending aorta morphogenesis,GO:0042102~positive regulation of T cell proliferation,GO:0042517~positive regulation of tyrosine phosphorylation of Stat3 protein,GO:0042668~auditory receptor cell fate determination,GO:0043388~positive regulation of DNA binding,GO:0045598~regulation of fat cell differentiation,GO:0045608~negative regulation of auditory receptor cell differentiation,GO:0045747~positive regulation of Notch signaling pathway,GO:0045892~negative regulation of transcription, DNA-templated,GO:0045944~positive regulation of transcription from RNA polymerase II promoter,GO:0045977~positive regulation of mitotic cell cycle, embryonic,GO:0046331~lateral inhibition,GO:0046427~positive regulation of JAK-STAT cascade,GO:0048469~cell maturation,GO:0048538~thymus development,GO:0048667~cell morphogenesis involved in neuron differentiation,GO:0048711~positive regulation of astrocyte differentiation,GO:0048715~negative regulation of oligodendrocyte differentiation,GO:0048844~artery morphogenesis,GO:0050678~regulation of epithelial cell proliferation,GO:0060122~inner ear receptor stereocilium organization,GO:0060164~regulation of timing of neuron differentiation,GO:0060253~negative regulation of glial cell proliferation,GO:0060412~ventricular septum</p> <p>morphogenesis,GO:0060675~ureteric bud</p> <p>morphogenesis,GO:0060716~labyrinthine layer blood vessel</p> <p>development,GO:0061009~common bile duct development,GO:0061106~negative regulation of stomach neuroendocrine cell differentiation,GO:0061309~cardiac neural crest cell development involved in outflow tract</p> <p>morphogenesis,GO:0061626~pharyngeal arch artery</p> <p>morphogenesis,GO:0072012~glomerulus vasculature</p> <p>development,GO:0072049~comma-shaped body morphogenesis,GO:0072050~S-shaped body morphogenesis,GO:0072141~renal interstitial fibroblast development,GO:0072282~metanephric nephron tubule</p> <p>morphogenesis,GO:0090102~cochlea development,GO:0090162~establishment of epithelial cell polarity,GO:0097084~vascular smooth muscle cell development,GO:0097150~neuronal stem cell population</p> <p>maintenance,GO:1903955~positive regulation of protein targeting to</p> |
|--|--|------------------------------------------------------------------------------------------------------------------------------------------------------------------------------------------------------------------------------------------------------------------------------------------------------------------------------------------------------------------------------------------------------------------------------------------------------------------------------------------------------------------------------------------------------------------------------------------------------------------------------------------------------------------------------------------------------------------------------------------------------------------------------------------------------------------------------------------------------------------------------------------------------------------------------------------------------------------------------------------------------------------------------------------------------------------------------------------------------------------------------------------------------------------------------------------------------------------------------------------------------------------------------------------------------------------------------------------------------------------------------------------------------------------------------------------------------------------------------------------------------------------------------------------------------------------------------------------------------------------------------------------------------------------------------------------------------------------------------------------------------------------------------------------------------------------------------------------------------------------------------------------------------------------------------------------------------------------------------------------------------------------------------------------------------------------------------------------------------------------------------------------------------------------------------------------------------------------------------------------------------------------------------------------------------------------------------------------------------------------------------------------------------------------------------------------------------------------------------------------------------------------------------------------------------------------------------------------------------|

|          |                                                |                                                                                                                                                                                                                                                                                                                                                                                                                                                                                                                                                                                                                                                                                          |
|----------|------------------------------------------------|------------------------------------------------------------------------------------------------------------------------------------------------------------------------------------------------------------------------------------------------------------------------------------------------------------------------------------------------------------------------------------------------------------------------------------------------------------------------------------------------------------------------------------------------------------------------------------------------------------------------------------------------------------------------------------------|
|          |                                                | mitochondrion,GO:2000227~negative regulation of pancreatic A cell differentiation,GO:2000737~negative regulation of stem cell differentiation,GO:2000974~negative regulation of pro-B cell differentiation,GO:2000978~negative regulation of forebrain neuron differentiation,                                                                                                                                                                                                                                                                                                                                                                                                           |
| HOXA9    | homeobox A9(HOXA9)                             | GO:0006351~transcription, DNA-templated,GO:0006355~regulation of transcription, DNA-templated,GO:0007275~multicellular organism development,GO:0007283~spermatogenesis,GO:0007338~single fertilization,GO:0008584~male gonad development,GO:0009952~anterior/posterior pattern specification,GO:0009954~proximal/distal pattern formation,GO:0030879~mammary gland development,GO:0035115~embryonic forelimb morphogenesis,GO:0042118~endothelial cell activation,GO:0045638~negative regulation of myeloid cell differentiation,GO:0048706~embryonic skeletal system development,GO:0060065~uterus development,GO:0060216~definitive hemopoiesis,                                       |
| HSDL1    | hydroxysteroid dehydrogenase like 1(HSDL1)     |                                                                                                                                                                                                                                                                                                                                                                                                                                                                                                                                                                                                                                                                                          |
| IVNS1ABP | influenza virus NS1A binding protein(IVNS1ABP) | GO:0006383~transcription from RNA polymerase III promoter,GO:0008380~RNA splicing,GO:0009615~response to virus,GO:2001243~negative regulation of intrinsic apoptotic signaling pathway,                                                                                                                                                                                                                                                                                                                                                                                                                                                                                                  |
| INSIG1   | insulin induced gene 1(INSIG1)                 | GO:0006641~triglyceride metabolic process,GO:0006695~cholesterol biosynthetic process,GO:0006991~response to sterol depletion,GO:0008152~metabolic process,GO:0008203~cholesterol metabolic process,GO:0008283~cell proliferation,GO:0010894~negative regulation of steroid biosynthetic process,GO:0032933~SREBP signaling pathway,GO:0042472~inner ear morphogenesis,GO:0042474~middle ear morphogenesis,GO:0045599~negative regulation of fat cell differentiation,GO:0045717~negative regulation of fatty acid biosynthetic process,GO:0060021~palate development,GO:0060363~cranial suture morphogenesis,GO:1901303~negative regulation of cargo loading into COPII-coated vesicle, |
| IGF1R    | insulin like growth factor 1 receptor(IGF1R)   | GO:0006955~immune response,GO:0007165~signal transduction,GO:0007169~transmembrane receptor protein tyrosine kinase signaling pathway,GO:0008284~positive regulation of cell proliferation,GO:0008286~insulin receptor signaling pathway,GO:0014065~phosphatidylinositol 3-kinase signaling,GO:0030335~positive regulation of cell                                                                                                                                                                                                                                                                                                                                                       |

|        |                                            |                                                                                                                                                                                                                                                                                                                                                                                                                                                                                                                                                                                                                                                                                                                                                                                                                                                                                            |
|--------|--------------------------------------------|--------------------------------------------------------------------------------------------------------------------------------------------------------------------------------------------------------------------------------------------------------------------------------------------------------------------------------------------------------------------------------------------------------------------------------------------------------------------------------------------------------------------------------------------------------------------------------------------------------------------------------------------------------------------------------------------------------------------------------------------------------------------------------------------------------------------------------------------------------------------------------------------|
|        |                                            | <p>migration,GO:0038083~peptidyl-tyrosine</p> <p>autophosphorylation,GO:0043066~negative regulation of apoptotic process,GO:0045740~positive regulation of DNA</p> <p>replication,GO:0046328~regulation of JNK cascade,GO:0046777~protein autophosphorylation,GO:0048009~insulin-like growth factor receptor signaling pathway,GO:0048015~phosphatidylinositol-mediated signaling,GO:0051262~protein tetramerization,GO:0051389~inactivation of MAPKK activity,</p>                                                                                                                                                                                                                                                                                                                                                                                                                        |
| KPNB1  | karyopherin subunit beta 1(KPNB1)          | <p>GO:0000059~protein import into nucleus, docking,GO:0000060~protein import into nucleus, translocation,GO:0006309~apoptotic DNA fragmentation,GO:0006606~protein import into nucleus,GO:0006607~NLS-bearing protein import into nucleus,GO:0006610~ribosomal protein import into nucleus,GO:0006886~intracellular protein transport,GO:0007079~mitotic chromosome movement towards spindle pole,GO:0007080~mitotic metaphase plate congression,GO:0019054~modulation by virus of host process,GO:0030953~astral microtubule organization,GO:0031291~Ran protein signal transduction,GO:0040001~establishment of mitotic spindle localization,GO:0045184~establishment of protein localization,GO:0075733~intracellular transport of virus,GO:0090307~mitotic spindle assembly,</p>                                                                                                       |
| KHDC4  | KH Domain Containing 4                     |                                                                                                                                                                                                                                                                                                                                                                                                                                                                                                                                                                                                                                                                                                                                                                                                                                                                                            |
| KLHL28 | kelch like family member 28(KLHL28)        | <p>GO:0042787~protein ubiquitination involved in ubiquitin-dependent protein catabolic process,</p>                                                                                                                                                                                                                                                                                                                                                                                                                                                                                                                                                                                                                                                                                                                                                                                        |
| MFAP3  | microfibrillar associated protein 3(MFAP3) |                                                                                                                                                                                                                                                                                                                                                                                                                                                                                                                                                                                                                                                                                                                                                                                                                                                                                            |
| NPM1   | nucleophosmin(NPM1)                        | <p>GO:0006281~DNA repair,GO:0006334~nucleosome assembly,GO:0006886~intracellular protein transport,GO:0006913~nucleocytoplasmic transport,GO:0006950~response to stress,GO:0006977~DNA damage response, signal transduction by p53 class mediator resulting in cell cycle arrest,GO:0007098~centrosome cycle,GO:0007165~signal transduction,GO:0007569~cell aging,GO:0008104~protein localization,GO:0008284~positive regulation of cell proliferation,GO:0008285~negative regulation of cell proliferation,GO:0010826~negative regulation of centrosome duplication,GO:0016032~viral process,GO:0032071~regulation of endodeoxyribonuclease activity,GO:0034080~CENP-A containing nucleosome assembly,GO:0042255~ribosome assembly,GO:0043066~negative regulation of apoptotic process,GO:0043085~positive regulation of catalytic activity,GO:0043523~regulation of neuron apoptotic</p> |

|       |                                                      |                                                                                                                                                                                                                                                                                                                                                                                                                                                                                                                                                                                                                                                                                                                                                                                                                    |
|-------|------------------------------------------------------|--------------------------------------------------------------------------------------------------------------------------------------------------------------------------------------------------------------------------------------------------------------------------------------------------------------------------------------------------------------------------------------------------------------------------------------------------------------------------------------------------------------------------------------------------------------------------------------------------------------------------------------------------------------------------------------------------------------------------------------------------------------------------------------------------------------------|
|       |                                                      | process,GO:0044387~negative regulation of protein kinase activity by regulation of protein phosphorylation,GO:0045727~positive regulation of translation,GO:0045740~positive regulation of DNA replication,GO:0045893~positive regulation of transcription, DNA-templated,GO:0046599~regulation of centriole replication,GO:0051092~positive regulation of NF-kappaB transcription factor activity,GO:0051259~protein oligomerization,GO:0051260~protein homooligomerization,GO:0060699~regulation of endoribonuclease activity,GO:0060735~regulation of eIF2 alpha phosphorylation by dsRNA,GO:1902751~positive regulation of cell cycle G2/M phase transition,                                                                                                                                                   |
| NUP50 | nucleoporin 50(NUP50)                                | GO:0006406~mRNA export from nucleus,GO:0006409~tRNA export from nucleus,GO:0006606~protein import into nucleus,GO:0007077~mitotic nuclear envelope disassembly,GO:0010827~regulation of glucose transport,GO:0016032~viral process,GO:0016925~protein sumoylation,GO:0019083~viral transcription,GO:0031047~gene silencing by RNA,GO:0046907~intracellular transport,GO:0075733~intracellular transport of virus,GO:1900034~regulation of cellular response to heat,                                                                                                                                                                                                                                                                                                                                               |
| PAIP1 | poly(A) binding protein interacting protein 1(PAIP1) | GO:0000289~nuclear-transcribed mRNA poly(A) tail shortening,GO:0006413~translational initiation,GO:0045727~positive regulation of translation,GO:0048255~mRNA stabilization,                                                                                                                                                                                                                                                                                                                                                                                                                                                                                                                                                                                                                                       |
| PAIP2 | poly(A) binding protein interacting protein 2(PAIP2) | GO:0007283~spermatogenesis,GO:0007613~memory,GO:0045947~negative regulation of translational initiation,GO:1900271~regulation of long-term synaptic potentiation,                                                                                                                                                                                                                                                                                                                                                                                                                                                                                                                                                                                                                                                  |
| PREPL | prolyl endopeptidase-like(PREPL)                     | GO:0006508~proteolysis,                                                                                                                                                                                                                                                                                                                                                                                                                                                                                                                                                                                                                                                                                                                                                                                            |
| PRKCE | protein kinase C epsilon(PRKCE)                      | GO:0002281~macrophage activation involved in immune response,GO:0006468~protein phosphorylation,GO:0006915~apoptotic process,GO:0007049~cell cycle,GO:0007155~cell adhesion,GO:0007165~signal transduction,GO:0007202~activation of phospholipase C activity,GO:0010634~positive regulation of epithelial cell migration,GO:0010763~positive regulation of fibroblast migration,GO:0010811~positive regulation of cell-substrate adhesion,GO:0018105~peptidyl-serine phosphorylation,GO:0030168~platelet activation,GO:0030838~positive regulation of actin filament polymerization,GO:0031397~negative regulation of protein ubiquitination,GO:0031663~lipopolysaccharide-mediated signaling pathway,GO:0032024~positive regulation of insulin secretion,GO:0032230~positive regulation of synaptic transmission, |

|        |                                                                 |                                                                                                                                                                                                                                                                                                                                                                                                                                                                                                                                                                                                                                                                                                                                                                                                                                                                                                                                                                                                                                                                                                                                                                                                                                                                                |
|--------|-----------------------------------------------------------------|--------------------------------------------------------------------------------------------------------------------------------------------------------------------------------------------------------------------------------------------------------------------------------------------------------------------------------------------------------------------------------------------------------------------------------------------------------------------------------------------------------------------------------------------------------------------------------------------------------------------------------------------------------------------------------------------------------------------------------------------------------------------------------------------------------------------------------------------------------------------------------------------------------------------------------------------------------------------------------------------------------------------------------------------------------------------------------------------------------------------------------------------------------------------------------------------------------------------------------------------------------------------------------|
|        |                                                                 | <p>GABAergic,GO:0032467~positive regulation of cytokinesis,GO:0035556~intracellular signal transduction,GO:0035641~locomotory exploration behavior,GO:0035669~TRAM-dependent toll-like receptor 4 signaling pathway,GO:0038096~Fc-gamma receptor signaling pathway involved in phagocytosis,GO:0043123~positive regulation of I-kappaB kinase/NF-kappaB signaling,GO:0043278~response to morphine,GO:0043410~positive regulation of MAPK cascade,GO:0050730~regulation of peptidyl-tyrosine phosphorylation,GO:0050996~positive regulation of lipid catabolic process,GO:0051209~release of sequestered calcium ion into cytosol,GO:0051279~regulation of release of sequestered calcium ion into cytosol,GO:0051301~cell division,GO:0061178~regulation of insulin secretion involved in cellular response to glucose stimulus,GO:0070257~positive regulation of mucus secretion,GO:0071361~cellular response to ethanol,GO:0071380~cellular response to prostaglandin E stimulus,GO:0071456~cellular response to hypoxia,GO:0090303~positive regulation of wound healing,GO:2000273~positive regulation of receptor activity,GO:2000650~negative regulation of sodium ion transmembrane transporter activity,GO:2001031~positive regulation of cellular glucuronidation,</p> |
| PPP3R1 | protein phosphatase 3 regulatory subunit B, alpha(PPP3R1)       | <p>GO:0006470~protein dephosphorylation,GO:0007223~Wnt signaling pathway, calcium modulating pathway,GO:0033173~calcineurin-NFAT signaling cascade,GO:0038095~Fc-epsilon receptor signaling pathway,GO:0045944~positive regulation of transcription from RNA polymerase II promoter,GO:0051533~positive regulation of NFAT protein import into nucleus,GO:1900740~positive regulation of protein insertion into mitochondrial membrane involved in apoptotic signaling pathway,</p>                                                                                                                                                                                                                                                                                                                                                                                                                                                                                                                                                                                                                                                                                                                                                                                            |
| PCMT1  | protein-L-isoaspartate (D-aspartate) O-methyltransferase(PCMT1) | <p>GO:0006479~protein methylation,GO:0030091~protein repair,GO:0098609~cell-cell adhesion,</p>                                                                                                                                                                                                                                                                                                                                                                                                                                                                                                                                                                                                                                                                                                                                                                                                                                                                                                                                                                                                                                                                                                                                                                                 |
| RMND5A | required for meiotic nuclear division 5 homolog A(RMND5A)       | <p>GO:0042787~protein ubiquitination involved in ubiquitin-dependent protein catabolic process,GO:0043161~proteasome-mediated ubiquitin-dependent protein catabolic process,</p>                                                                                                                                                                                                                                                                                                                                                                                                                                                                                                                                                                                                                                                                                                                                                                                                                                                                                                                                                                                                                                                                                               |
| RTN4   | reticulon 4(RTN4)                                               | <p>GO:0006915~apoptotic process,GO:0007413~axonal fasciculation,GO:0021801~cerebral cortex radial glia guided migration,GO:0030308~negative regulation of cell growth,GO:0030334~regulation of cell migration,GO:0030517~negative regulation of axon extension,GO:0042981~regulation of apoptotic</p>                                                                                                                                                                                                                                                                                                                                                                                                                                                                                                                                                                                                                                                                                                                                                                                                                                                                                                                                                                          |

|         |                                                                  |                                                                                                                                                                                                                                                                                                                                                                                                                                                                                                                                                                                                                                                                                                                                                                                              |
|---------|------------------------------------------------------------------|----------------------------------------------------------------------------------------------------------------------------------------------------------------------------------------------------------------------------------------------------------------------------------------------------------------------------------------------------------------------------------------------------------------------------------------------------------------------------------------------------------------------------------------------------------------------------------------------------------------------------------------------------------------------------------------------------------------------------------------------------------------------------------------------|
|         |                                                                  | process,GO:0050771~negative regulation of axonogenesis,GO:0051292~nuclear pore complex assembly,GO:0060317~cardiac epithelial to mesenchymal transition,GO:0071786~endoplasmic reticulum tubular network organization,GO:0071787~endoplasmic reticulum tubular network assembly,GO:0098609~cell-cell adhesion,GO:2000172~regulation of branching morphogenesis of a nerve,                                                                                                                                                                                                                                                                                                                                                                                                                   |
| RECK    | reversion inducing cysteine rich protein with kazal motifs(RECK) | GO:0001955~blood vessel maturation,GO:0007566~embryo implantation,GO:0030198~extracellular matrix organization,GO:0030336~negative regulation of cell migration,GO:0035115~embryonic forelimb morphogenesis,GO:1904684~negative regulation of metalloendopeptidase activity,                                                                                                                                                                                                                                                                                                                                                                                                                                                                                                                 |
| SEPTIN7 | septin 7(SEPT7)                                                  | GO:0000910~cytokinesis,GO:0007067~mitotic nuclear division,GO:0016476~regulation of embryonic cell shape,GO:0051291~protein heterooligomerization,GO:0060271~cilium morphogenesis,GO:0098609~cell-cell adhesion,GO:1902857~positive regulation of nonmotile primary cilium assembly,                                                                                                                                                                                                                                                                                                                                                                                                                                                                                                         |
| SGK3    | serum/glucocorticoid regulated kinase family member 3(SGK3)      | GO:0001558~regulation of cell growth,GO:0006468~protein phosphorylation,GO:0006883~cellular sodium ion homeostasis,GO:0006950~response to stress,GO:0010765~positive regulation of sodium ion transport,GO:0018105~peptidyl-serine phosphorylation,GO:0030334~regulation of cell migration,GO:0032411~positive regulation of transporter activity,GO:0034220~ion transmembrane transport,GO:0035556~intracellular signal transduction,GO:0042127~regulation of cell proliferation,GO:0042981~regulation of apoptotic process,GO:0051090~regulation of sequence-specific DNA binding transcription factor activity,                                                                                                                                                                           |
| SESN2   | sestrin 2(SESN2)                                                 | GO:0001932~regulation of protein phosphorylation,GO:0006635~fatty acid beta-oxidation,GO:0006914~autophagy,GO:0009749~response to glucose,GO:0016239~positive regulation of macroautophagy,GO:0030308~negative regulation of cell growth,GO:0030330~DNA damage response, signal transduction by p53 class mediator,GO:0032042~mitochondrial DNA metabolic process,GO:0032868~response to insulin,GO:0034599~cellular response to oxidative stress,GO:0036091~positive regulation of transcription from RNA polymerase II promoter in response to oxidative stress,GO:0043491~protein kinase B signaling,GO:0046323~glucose import,GO:0070328~triglyceride homeostasis,GO:0071230~cellular response to amino acid stimulus,GO:0071233~cellular response to leucine,GO:0072593~reactive oxygen |

|        |                                             |                                                                                                                                                                                                                                                                                                                                                                                                                                                                                                                                                                                                                                                                                                                                                                                                                                                                                                                                                                                                                                                                                                                                                                     |
|--------|---------------------------------------------|---------------------------------------------------------------------------------------------------------------------------------------------------------------------------------------------------------------------------------------------------------------------------------------------------------------------------------------------------------------------------------------------------------------------------------------------------------------------------------------------------------------------------------------------------------------------------------------------------------------------------------------------------------------------------------------------------------------------------------------------------------------------------------------------------------------------------------------------------------------------------------------------------------------------------------------------------------------------------------------------------------------------------------------------------------------------------------------------------------------------------------------------------------------------|
|        |                                             | <p>species metabolic process,GO:0090526~regulation of gluconeogenesis involved in cellular glucose homeostasis,GO:0098869~cellular oxidant detoxification,GO:1900182~positive regulation of protein localization to nucleus,GO:1901031~regulation of response to reactive oxygen species,GO:1902010~negative regulation of translation in response to endoplasmic reticulum stress,GO:1904262~negative regulation of TORC1 signaling,GO:2000479~regulation of cAMP-dependent protein kinase activity,</p>                                                                                                                                                                                                                                                                                                                                                                                                                                                                                                                                                                                                                                                           |
| SLC6A9 | solute carrier family 6 member 9(SLC6A9)    | <p>GO:0003333~amino acid transmembrane transport,GO:0006810~transport,GO:0015816~glycine transport,GO:0036233~glycine import,GO:0060012~synaptic transmission, glycinergic,GO:0061537~glycine secretion, neurotransmission,</p>                                                                                                                                                                                                                                                                                                                                                                                                                                                                                                                                                                                                                                                                                                                                                                                                                                                                                                                                     |
| SNX4   | sorting nexin 4(SNX4)                       | <p>GO:0006897~endocytosis,GO:0015031~protein transport,GO:0016050~vesicle organization,GO:0032456~endocytic recycling,GO:1903595~positive regulation of histamine secretion by mast cell,</p>                                                                                                                                                                                                                                                                                                                                                                                                                                                                                                                                                                                                                                                                                                                                                                                                                                                                                                                                                                       |
| SPEN   | spen family transcriptional repressor(SPEN) | <p>GO:0000122~negative regulation of transcription from RNA polymerase II promoter,GO:0000398~mRNA splicing, via spliceosome,GO:0006351~transcription, DNA-templated,GO:0007219~Notch signaling pathway,GO:0016032~viral process,GO:0045892~negative regulation of transcription, DNA-templated,GO:0050769~positive regulation of neurogenesis,</p>                                                                                                                                                                                                                                                                                                                                                                                                                                                                                                                                                                                                                                                                                                                                                                                                                 |
| SYPL1  | synaptophysin like 1(SYPL1)                 | <p>GO:0006810~transport,GO:0007268~chemical synaptic transmission,</p>                                                                                                                                                                                                                                                                                                                                                                                                                                                                                                                                                                                                                                                                                                                                                                                                                                                                                                                                                                                                                                                                                              |
| THBS1  | thrombospondin 1(THBS1)                     | <p>GO:0000187~activation of MAPK activity,GO:0001666~response to hypoxia,GO:0001937~negative regulation of endothelial cell proliferation,GO:0001953~negative regulation of cell-matrix adhesion,GO:0002040~sprouting angiogenesis,GO:0002544~chronic inflammatory response,GO:0002576~platelet degranulation,GO:0002581~negative regulation of antigen processing and presentation of peptide or polysaccharide antigen via MHC class II,GO:0002605~negative regulation of dendritic cell antigen processing and presentation,GO:0006954~inflammatory response,GO:0006955~immune response,GO:0006986~response to unfolded protein,GO:0007050~cell cycle arrest,GO:0007155~cell adhesion,GO:0008284~positive regulation of cell proliferation,GO:0009612~response to mechanical stimulus,GO:0009749~response to glucose,GO:0010595~positive regulation of endothelial cell migration,GO:0010596~negative regulation of endothelial cell migration,GO:0010748~negative regulation of plasma membrane long-chain fatty acid transport,GO:0010751~negative regulation of nitric oxide mediated signal transduction,GO:0010754~negative regulation of cGMP-mediated</p> |

|  |  |                                                                                                                                                                                                                                                                                                                                                                                                                                                                                                                                                                                                                                                                                                                                                                                                                                                                                                                                                                                                                                                                                                                                                                                                                                                                                                                                                                                                                                                                                                                                                                                                                                                                                                                                                                                                                                                                                                                                                                                                                                                                                                                                                                                                                                                                                                                                                                                                                                                                                                                                                                                                                      |
|--|--|----------------------------------------------------------------------------------------------------------------------------------------------------------------------------------------------------------------------------------------------------------------------------------------------------------------------------------------------------------------------------------------------------------------------------------------------------------------------------------------------------------------------------------------------------------------------------------------------------------------------------------------------------------------------------------------------------------------------------------------------------------------------------------------------------------------------------------------------------------------------------------------------------------------------------------------------------------------------------------------------------------------------------------------------------------------------------------------------------------------------------------------------------------------------------------------------------------------------------------------------------------------------------------------------------------------------------------------------------------------------------------------------------------------------------------------------------------------------------------------------------------------------------------------------------------------------------------------------------------------------------------------------------------------------------------------------------------------------------------------------------------------------------------------------------------------------------------------------------------------------------------------------------------------------------------------------------------------------------------------------------------------------------------------------------------------------------------------------------------------------------------------------------------------------------------------------------------------------------------------------------------------------------------------------------------------------------------------------------------------------------------------------------------------------------------------------------------------------------------------------------------------------------------------------------------------------------------------------------------------------|
|  |  | <p>signaling,GO:0010757~negative regulation of plasminogen activation,GO:0010759~positive regulation of macrophage chemotaxis,GO:0010763~positive regulation of fibroblast migration,GO:0016477~cell migration,GO:0016525~negative regulation of angiogenesis,GO:0018149~peptide cross-linking,GO:0030194~positive regulation of blood coagulation,GO:0030198~extracellular matrix organization,GO:0030335~positive regulation of cell migration,GO:0030511~positive regulation of transforming growth factor beta receptor signaling pathway,GO:0030823~regulation of cGMP metabolic process,GO:0032026~response to magnesium ion,GO:0032570~response to progesterone,GO:0032695~negative regulation of interleukin-12 production,GO:0032914~positive regulation of transforming growth factor beta1 production,GO:0033574~response to testosterone,GO:0034605~cellular response to heat,GO:0034976~response to endoplasmic reticulum stress,GO:0036066~protein O-linked fucosylation,GO:0040037~negative regulation of fibroblast growth factor receptor signaling pathway,GO:0042327~positive regulation of phosphorylation,GO:0042493~response to drug,GO:0042535~positive regulation of tumor necrosis factor biosynthetic process,GO:0043032~positive regulation of macrophage activation,GO:0043066~negative regulation of apoptotic process,GO:0043154~negative regulation of cysteine-type endopeptidase activity involved in apoptotic process,GO:0043536~positive regulation of blood vessel endothelial cell migration,GO:0043537~negative regulation of blood vessel endothelial cell migration,GO:0043652~engulfment of apoptotic cell,GO:0045727~positive regulation of translation,GO:0045766~positive regulation of angiogenesis,GO:0048266~behavioral response to pain,GO:0048661~positive regulation of smooth muscle cell proliferation,GO:0050921~positive regulation of chemotaxis,GO:0051592~response to calcium ion,GO:0051895~negative regulation of focal adhesion assembly,GO:0051897~positive regulation of protein kinase B signaling,GO:0051918~negative regulation of fibrinolysis,GO:0071356~cellular response to tumor necrosis factor,GO:0071363~cellular response to growth factor stimulus,GO:1902043~positive regulation of extrinsic apoptotic signaling pathway via death domain receptors,GO:2000353~positive regulation of endothelial cell apoptotic process,GO:2000379~positive regulation of reactive oxygen species metabolic process,GO:2001027~negative regulation of endothelial cell chemotaxis,GO:2001237~negative regulation of extrinsic apoptotic signaling</p> |
|--|--|----------------------------------------------------------------------------------------------------------------------------------------------------------------------------------------------------------------------------------------------------------------------------------------------------------------------------------------------------------------------------------------------------------------------------------------------------------------------------------------------------------------------------------------------------------------------------------------------------------------------------------------------------------------------------------------------------------------------------------------------------------------------------------------------------------------------------------------------------------------------------------------------------------------------------------------------------------------------------------------------------------------------------------------------------------------------------------------------------------------------------------------------------------------------------------------------------------------------------------------------------------------------------------------------------------------------------------------------------------------------------------------------------------------------------------------------------------------------------------------------------------------------------------------------------------------------------------------------------------------------------------------------------------------------------------------------------------------------------------------------------------------------------------------------------------------------------------------------------------------------------------------------------------------------------------------------------------------------------------------------------------------------------------------------------------------------------------------------------------------------------------------------------------------------------------------------------------------------------------------------------------------------------------------------------------------------------------------------------------------------------------------------------------------------------------------------------------------------------------------------------------------------------------------------------------------------------------------------------------------------|

|         |                                                                                                   |                                                                                                                                                                                                                                                                                                                                                                                                                                                                                                                                                                                                                                                                                                                      |
|---------|---------------------------------------------------------------------------------------------------|----------------------------------------------------------------------------------------------------------------------------------------------------------------------------------------------------------------------------------------------------------------------------------------------------------------------------------------------------------------------------------------------------------------------------------------------------------------------------------------------------------------------------------------------------------------------------------------------------------------------------------------------------------------------------------------------------------------------|
|         |                                                                                                   | pathway,                                                                                                                                                                                                                                                                                                                                                                                                                                                                                                                                                                                                                                                                                                             |
| TOB1    | transducer of ERBB2,<br>1(TOB1)                                                                   | GO:0007184~SMAD protein import into nucleus,GO:0008285~negative regulation of cell proliferation,GO:0009967~positive regulation of signal transduction,GO:0017148~negative regulation of translation,GO:0030509~BMP signaling pathway,GO:0030514~negative regulation of BMP signaling pathway,GO:0045668~negative regulation of osteoblast differentiation,GO:0060212~negative regulation of nuclear-transcribed mRNA poly(A) tail shortening,GO:0060213~positive regulation of nuclear-transcribed mRNA poly(A) tail shortening,GO:1900153~positive regulation of nuclear-transcribed mRNA catabolic process, deadenylation-dependent decay,GO:1903507~negative regulation of nucleic acid-templated transcription, |
| TMEM245 | transmembrane protein<br>245(TMEM245)                                                             | GO:0055085~transmembrane transport,                                                                                                                                                                                                                                                                                                                                                                                                                                                                                                                                                                                                                                                                                  |
| TNRC6A  | trinucleotide repeat<br>containing<br>6A(TNRC6A)                                                  | GO:0007223~Wnt signaling pathway, calcium modulating pathway,GO:0031047~gene silencing by RNA,GO:0035194~posttranscriptional gene silencing by RNA,GO:0035195~gene silencing by miRNA,GO:0035278~miRNA mediated inhibition of translation,GO:0048015~phosphatidylinositol-mediated signaling,                                                                                                                                                                                                                                                                                                                                                                                                                        |
| TRIM37  | tripartite motif<br>containing 37(TRIM37)                                                         | GO:0000122~negative regulation of transcription from RNA polymerase II promoter,GO:0006351~transcription, DNA-templated,GO:0032088~negative regulation of NF-kappaB transcription factor activity,GO:0035518~histone H2A monoubiquitination,GO:0036353~histone H2A-K119 monoubiquitination,GO:0046600~negative regulation of centriole replication,GO:0051091~positive regulation of sequence-specific DNA binding transcription factor activity,GO:0051092~positive regulation of NF-kappaB transcription factor activity,GO:0051865~protein autoubiquitination,GO:0070842~aggresome assembly,                                                                                                                      |
| YWHAG   | tyrosine 3-<br>monooxygenase/tryptop<br>han 5-monooxygenase<br>activation protein<br>gamma(YWHAG) | GO:0000086~G2/M transition of mitotic cell cycle,GO:0006469~negative regulation of protein kinase activity,GO:0006605~protein targeting,GO:0009966~regulation of signal transduction,GO:0032869~cellular response to insulin stimulus,GO:0045664~regulation of neuron differentiation,GO:0048167~regulation of synaptic plasticity,GO:0061024~membrane organization,GO:0071901~negative regulation of protein serine/threonine kinase activity,GO:1900740~positive regulation of protein insertion into mitochondrial membrane involved in apoptotic signaling pathway,                                                                                                                                              |
| VLDLR   | very low density<br>lipoprotein                                                                   | GO:0000122~negative regulation of transcription from RNA polymerase II promoter,GO:0006869~lipid transport,GO:0006898~receptor-mediated                                                                                                                                                                                                                                                                                                                                                                                                                                                                                                                                                                              |

|         |                                              |                                                                                                                                                                                                                                                                                                                                                                                                                                                                                      |
|---------|----------------------------------------------|--------------------------------------------------------------------------------------------------------------------------------------------------------------------------------------------------------------------------------------------------------------------------------------------------------------------------------------------------------------------------------------------------------------------------------------------------------------------------------------|
|         | receptor(VLDLR)                              | endocytosis,GO:0007165~signal transduction,GO:0007399~nervous system development,GO:0007613~memory,GO:0008203~cholesterol metabolic process,GO:0021517~ventral spinal cord development,GO:0034436~glycoprotein transport,GO:0034447~very-low-density lipoprotein particle clearance,GO:0038026~reelin-mediated signaling pathway,GO:0045860~positive regulation of protein kinase activity,GO:0048813~dendrite morphogenesis,GO:1900006~positive regulation of dendrite development, |
| ZFAND5  | zinc finger AN1-type containing 5(ZFAND5)    | GO:0001701~in utero embryonic development,GO:0001944~vasculature development,GO:0003016~respiratory system process,GO:0010761~fibroblast migration,GO:0048008~platelet-derived growth factor receptor signaling pathway,GO:0048705~skeletal system morphogenesis,GO:0048745~smooth muscle tissue development,GO:0060324~face development,                                                                                                                                            |
| ZCCHC14 | zinc finger CCHC-type containing 14(ZCCHC14) |                                                                                                                                                                                                                                                                                                                                                                                                                                                                                      |
| ZCCHC3  | zinc finger CCHC-type containing 3(ZCCHC3)   |                                                                                                                                                                                                                                                                                                                                                                                                                                                                                      |
| ZNF280B | zinc finger protein 280B(ZNF280B)            | GO:0000122~negative regulation of transcription from RNA polymerase II promoter,GO:0006351~transcription, DNA-templated,GO:0007411~axon guidance,GO:0045892~negative regulation of transcription, DNA-templated,                                                                                                                                                                                                                                                                     |
